# Supplementary material for: Initial Molecular Mechanisms of the Pathogenesis of Parkinson’s Disease in a Mouse Neurotoxic Model of the Earliest Preclinical Stage of This Disease
Source: MDPI journal article supplement (doi:10.3390/ijms25021354), 2024-01-22
Supplement: s1 [file s1]

Table S1. Genes and their target names on PCR chips for Open Array technology

| No | Gene           | Target Name   | Reporter |    |                |               |     |
|----|----------------|---------------|----------|----|----------------|---------------|-----|
| 1  | <i>Cyc1</i>    | Mm00470540_m1 | FAM      | 46 | <i>Agtr2</i>   | Mm00431727_g1 | FAM |
| 2  | <i>Th</i>      | Mm00447557_m1 | FAM      | 47 | <i>Keap1</i>   | Mm00497268_m1 | FAM |
| 3  | <i>Ddc</i>     | Mm00516688_m1 | FAM      | 48 | <i>Sigmar1</i> | Mm01223547_g1 | FAM |
| 4  | <i>Dbh</i>     | Mm00460472_m1 | FAM      | 49 | <i>Cacna1d</i> | Mm01209927_g1 | FAM |
| 5  | <i>Pnmt</i>    | Mm00476993_m1 | FAM      | 50 | <i>Trpm2</i>   | Mm00663098_m1 | FAM |
| 6  | <i>Maoa</i>    | Mm00558004_m1 | FAM      | 51 | <i>Park2</i>   | Mm01323528_m1 | FAM |
| 7  | <i>Maob</i>    | Mm00555412_m1 | FAM      | 52 | <i>Ube2n</i>   | Mm00779119_s1 | FAM |
| 8  | <i>Comt</i>    | Mm00514377_m1 | FAM      | 53 | <i>Uba3</i>    | Mm00495866_m1 | FAM |
| 9  | <i>Slc6a3</i>  | Mm00438388_m1 | FAM      | 54 | <i>Psmc4</i>   | Mm01263563_m1 | FAM |
| 10 | <i>Slc18a1</i> | Mm00461868_m1 | FAM      | 55 | <i>Psmc3</i>   | Mm00477177_m1 | FAM |
| 11 | <i>Slc18a2</i> | Mm00553058_m1 | FAM      | 56 | <i>Psmd4</i>   | Mm01263490_m1 | FAM |
| 12 | <i>Drd1</i>    | Mm02620146_s1 | FAM      | 57 | <i>Usp47</i>   | Mm00659716_m1 | FAM |
| 13 | <i>Drd2</i>    | Mm00438545_m1 | FAM      | 58 | <i>Ubb</i>     | Mm01622233_g1 | FAM |
| 14 | <i>Drd3</i>    | Mm00432887_m1 | FAM      | 59 | <i>Bdnf</i>    | Mm04230607_s1 | FAM |
| 15 | <i>Drd4</i>    | Mm00432893_m1 | FAM      | 60 | <i>Gdnf</i>    | Mm00599849_m1 | FAM |
| 16 | <i>Drd5</i>    | Mm04210376_s1 | FAM      | 61 | <i>Ngf</i>     | Mm00443039_m1 | FAM |
| 17 | <i>Kif1a</i>   | Mm00492863_m1 | FAM      | 62 | <i>Vegfa</i>   | Mm00437306_m1 | FAM |
| 18 | <i>Kif1b</i>   | Mm00801813_m1 | FAM      | 63 | <i>Cdnf</i>    | Mm00617407_m1 | FAM |
| 19 | <i>Kif5a</i>   | Mm00515265_m1 | FAM      | 64 | <i>Ntrk2</i>   | Mm00435422_m1 | FAM |
| 20 | <i>Kif2c</i>   | Mm00728630_s1 | FAM      | 65 | <i>Ntrk1</i>   | Mm01219406_m1 | FAM |
| 21 | <i>Dync1h1</i> | Mm00466548_m1 | FAM      | 66 | <i>Ngfr</i>    | Mm00446296_m1 | FAM |
| 22 | <i>Dynll1</i>  | Mm00850282_g1 | FAM      | 67 | <i>Nr4a2</i>   | Mm00443060_m1 | FAM |
| 23 | <i>Dctn1</i>   | Mm01184845_m1 | FAM      | 68 | <i>Mmp3</i>    | Mm00440295_m1 | FAM |
| 24 | <i>Mapt</i>    | Mm00521988_m1 | FAM      | 69 | <i>Pitx3</i>   | Mm01194166_g1 | FAM |
| 25 | <i>Map2</i>    | Mm00485231_m1 | FAM      | 70 | <i>Wnt11</i>   | Mm00437327_g1 | FAM |
| 26 | <i>Mark2</i>   | Mm01220150_g1 | FAM      | 71 | <i>Ctnnb1</i>  | Mm00483039_m1 | FAM |
| 27 | <i>Tubb3</i>   | Mm00727586_s1 | FAM      | 72 | <i>Slc29a4</i> | Mm00525575_m1 | FAM |
| 28 | <i>Tuba1a</i>  | Mm00846967_g1 | FAM      | 73 | <i>Calb1</i>   | Mm00486647_m1 | FAM |
| 29 | <i>Snca</i>    | Mm01188700_m1 | FAM      | 74 | <i>Ifng</i>    | Mm01168134_m1 | FAM |
| 30 | <i>Syn1</i>    | Mm00449772_m1 | FAM      | 75 | <i>Tgfb1</i>   | Mm01178820_m1 | FAM |
| 31 | <i>Stx1a</i>   | Mm00444008_m1 | FAM      | 76 | <i>Akt1</i>    | Mm01331626_m1 | FAM |
| 32 | <i>Syt1</i>    | Mm00436858_m1 | FAM      | 77 | <i>Cnr1</i>    | Mm01212171_s1 | FAM |
| 33 | <i>Syt11</i>   | Mm00444517_m1 | FAM      | 78 | <i>Ptgs2</i>   | Mm00478374_m1 | FAM |
| 34 | <i>Rab5a</i>   | Mm00727887_s1 | FAM      | 79 | <i>Clk1</i>    | Mm00438254_m1 | FAM |
| 35 | <i>Rab7</i>    | Mm00784318_sH | FAM      | 80 | <i>Traf1</i>   | Mm00493827_m1 | FAM |
| 36 | <i>Nsf</i>     | Mm00435390_m1 | FAM      | 81 | <i>Cxcl11</i>  | Mm00444662_m1 | FAM |
| 37 | <i>Dnm1l</i>   | Mm01342903_m1 | FAM      | 82 | <i>Casp1</i>   | Mm00438023_m1 | FAM |
| 38 | <i>Vps35</i>   | Mm00458167_m1 | FAM      | 83 | <i>Casp3</i>   | Mm01195085_m1 | FAM |
| 39 | <i>Sod1</i>    | Mm01344233_g1 | FAM      | 84 | <i>Parp1</i>   | Mm01321084_m1 | FAM |
| 40 | <i>Gpx1</i>    | Mm00656767_g1 | FAM      | 85 | <i>Aifm1</i>   | Mm00442548_m1 | FAM |
| 41 | <i>Gsr</i>     | Mm00439154_m1 | FAM      | 86 | <i>Bcl2l11</i> | Mm00437796_m1 | FAM |
| 42 | <i>Txnrd1</i>  | Mm00443675_m1 | FAM      | 87 | <i>Map3k5</i>  | Mm00434883_m1 | FAM |
| 43 | <i>Nos1</i>    | Mm01208059_m1 | FAM      | 88 | <i>Cib1</i>    | Mm00501944_m1 | FAM |
| 44 | <i>Prdx1</i>   | Mm01621996_s1 | FAM      | 89 | <i>Trp53</i>   | Mm01731290_g1 | FAM |
| 45 | <i>Nfe2l2</i>  | Mm00477784_m1 | FAM      | 90 | <i>Bax</i>     | Mm00432051_m1 | FAM |
|    |                |               |          | 91 | <i>Fos</i>     | Mm00487425_m1 | FAM |

|    |                |               |     |
|----|----------------|---------------|-----|
| 92 | <i>Mapk8</i>   | Mm00489514_m1 | FAM |
| 93 | <i>Lamp2</i>   | Mm00495267_m1 | FAM |
| 94 | <i>Atg16l1</i> | Mm00513085_m1 | FAM |
| 95 | <i>Atg5</i>    | Mm01187303_m1 | FAM |
| 96 | <i>Capn1</i>   | Mm00482964_m1 | FAM |
| 97 | <i>Tnf</i>     | Mm00443258_m1 | FAM |

|     |                |               |     |
|-----|----------------|---------------|-----|
| 98  | <i>Ctsb</i>    | Mm01310506_m1 | FAM |
| 99  | <i>Ern2</i>    | Mm00469005_m1 | FAM |
| 100 | <i>Eif2ak3</i> | Mm00438700_m1 | FAM |
| 101 | <i>Atf6</i>    | Mm01295319_m1 | FAM |
| 102 | <i>Gfap</i>    | Mm01253033_m1 | FAM |

Table S2. The main characteristics of the substantia nigra and striatum 1, 3, 6, and 24 h after twice administration of MPTP at a single dose of 6 mg/kg.

| Time after NaCl or MPTP injections                                                        | 1 h          |              | 3 h          |              | 6 h           |              | 24 h          |              |
|-------------------------------------------------------------------------------------------|--------------|--------------|--------------|--------------|---------------|--------------|---------------|--------------|
| Substance                                                                                 | Control      | MPTP         | Control      | MPTP         | Control       | MPTP         | Control       | MPTP         |
| Substantia nigra                                                                          |              |              |              |              |               |              |               |              |
| DA, pmol                                                                                  | 4.07 ± 0.57  | 1.89 ± 0.33  | 4.81 ± 0.31  | 1.94 ± 0.22  | 4.46 ± 0.25   | 2.51 ± 0.16  | 4.65 ± 0.28   | 4.27 ± 0.50  |
| DOPAC, pmol                                                                               | 1.81 ± 0.20  | 0.19 ± 0.01  | 1.93 ± 0.15  | 0.22 ± 0.01  | 2.16 ± 0.12   | 0.27 ± 0.02  | 1.94 ± 0.20   | 2.22 ± 0.13  |
| HVA, pmol                                                                                 | 2.00 ± 0.24  | 1.32 ± 0.18  | 2.34 ± 0.11  | 1.21 ± 0.03  | 2.03 ± 0.08   | 1.21 ± 0.09  | 1.94 ± 0.14   | 2.21 ± 0.15  |
| TH activity, % of control                                                                 | 100 ± 5.3    | 72.8 ± 6.8   | 100 ± 5.3    | 64.5 ± 6.1   | 100 ± 5.3     | 77.1 ± 6.0   | 100 ± 6.0     | 93.0 ± 8.0   |
| DOPAC/DA, % of control                                                                    | 100 ± 10.6   | 20.7 ± 8.3   | 100 ± 10.1   | 24.5 ± 16.1  | 100 ± 11.8    | 21.5 ± 7.0   | 100 ± 9.7     | 88.2 ± 5.2   |
| HVA/DA, % of control                                                                      | 100 ± 10.9   | 143.9 ± 15.1 | 100 ± 3.0    | 129.2 ± 8.9  | 100 ± 2.7     | 110.0 ± 4.2  | 100 ± 5.8     | 123.5 ± 6.2  |
| Striatum                                                                                  |              |              |              |              |               |              |               |              |
| Number of varicose swellings of nerve fibers immunopositive for TH, AADC and DAT, (units) | 985.6 ± 31.2 | 904.3 ± 23.2 | 933.8 ± 12.5 | 798.7 ± 41.8 | 1089.0 ± 51.3 | 873.3 ± 55.7 | 1057.2 ± 50.7 | 757.5 ± 51.1 |
| Area of nerve fibers immunopositive for TH, AADC and DAT, $\mu\text{m}^2$                 | 970.0 ± 47.8 | 861.9 ± 62.6 | 870.3 ± 26.9 | 710.9 ± 42.0 | 1178.6 ± 39.3 | 869 ± 111.2  | 1172.9 ± 381. | 690.6 ± 75.7 |
| DA, pmol/mg                                                                               | 103.1 ± 0.9  | 104.2 ± 2.4  | 103.9 ± 1.2  | 75.3 ± 3.0   | 103.5 ± 1.3   | 69.2 ± 3.9   | 104.7 ± 1.5   | 54.9 ± 3.8   |
| DOPAC, pmol/mg                                                                            | 7.29 ± 0.30  | 1.56 ± 0.07  | 7.48 ± 0.20  | 2.76 ± 0.29  | 7.15 ± 0.23   | 2.12 ± 0.15  | 7.35 ± 0.38   | 4.96 ± 0.51  |
| 3-MT, pmol/mg                                                                             | 1.28 ± 0.14  | 1.42 ± 0.11  | 1.21 ± 0.11  | 3.81 ± 0.66  | 1.37 ± 0.16   | 0.98 ± 0.05  | 1.59 ± 0.04   | 1.60 ± 0.08  |
| HVA, pmol/mg                                                                              | 9.88 ± 0.46  | 6.44 ± 0.25  | 10.73 ± 0.31 | 8.09 ± 0.50  | 9.80 ± 0.45   | 5.50 ± 0.15  | 9.59 ± 0.43   | 6.44 ± 0.25  |
| TH activity                                                                               | 100.0 ± 5.0  | 178.6 ± 5.0  | 100.0 ± 5.0  | 32.6 ± 4.8   | 100.0 ± 5.0   | 83.7 ± 5.1   | 100.0 ± 1.7   | 67.1 ± 3.8   |
| DOPAC/DA, % of control                                                                    | 100 ± 3.2    | 20.8 ± 5.2   | 100 ± 2.5    | 56.1 ± 13.5  | 100 ± 2.4     | 49.3 ± 9.1   | 100 ± 6.9     | 116.2 ± 5.9  |
| HVA/DA, % of control                                                                      | 100 ± 4.2    | 63.0 ± 6.7   | 100 ± 1.7    | 115.0 ± 8.7  | 100 ± 3.1     | 88.4 ± 7.6   | 100 ± 3.4     | 108.0 ± 7.7  |
| 3-MT/DA, % of control                                                                     | 100 ± 7.7    | 110.5 ± 9.9  | 100 ± 9.3    | 433.8 ± 18.6 | 100 ± 12.4    | 115.1 ± 14.6 | 100 ± 3.8     | 165.2 ± 6.8  |
| TH content, % of control                                                                  | 100 ± 4.3    | 98.9 ± 5.9   | 100 ± 6.2    | 89.5 ± 6.2   | 100 ± 4.0     | 96.7 ± 5.5   | 100 ± 4.7     | 82.3 ± 4.0   |
| TH-P19 content, % of control                                                              | 100 ± 1.9    | 76.4 ± 8.2   | 100 ± 7.3    | 60.0 ± 5.6   | 100 ± 9.1     | 92.2 ± 4.4   | 100 ± 0.9     | 94.8 ± 6.5   |
| TH-P31 content, % of control                                                              | 100 ± 8.8    | 104.4 ± 9.0  | 100 ± 8.7    | 68.5 ± 3.8   | 100 ± 7.1     | 78.6 ± 8.0   | 100 ± 5.9     | 81.4 ± 6.8   |
| TH-P40 content, % of control                                                              | 100 ± 10.6   | 120.5 ± 3.5  | 100 ± 4.0    | 90.0 ± 1.4   | 100 ± 4.5     | 84.2 ± 4.2   | 100 ± 10.0    | 88.7 ± 10.4  |

3-MT – 3-methoxytyramine; AADC – aromatic L-amino acid decarboxylase; DA – dopamine; DAT – dopamine transporter; DOPAC – 3,4-dihydroxyphenylacetic acid; HVA – homovanillic acid; TH – tyrosine hydroxylase; TH-P19 – tyrosine hydroxylase phosphorylated at Ser19; TH-P31 – tyrosine hydroxylase phosphorylated at Ser31; TH-P40 – tyrosine hydroxylase phosphorylated at Ser40.

Table S3. Changes in the gene expression of proteins involved in synaptic neurotransmission, neurodegeneration, and neuroplasticity 1, 6, 24 h after administering of 1-methyl-4-phenyl-1,2,3,6-tetrahydropyridine (MPTP) to mice twice at a single dose of 6 mg/kg (“n” per group = 6). The data are presented as a ratio to the level in the control, taken as 1. Statistics indicate significance with control group by parametric Student’s test.

| Gene                                               | Protein                                     | Function              | Time after 2x6 mg/kg MPTP |      |             |      |             |      |
|----------------------------------------------------|---------------------------------------------|-----------------------|---------------------------|------|-------------|------|-------------|------|
|                                                    |                                             |                       | 1 h                       |      | 6 h         |      | 24 h        |      |
|                                                    |                                             |                       | Fold change               | P    | Fold change | P    | Fold change | P    |
| DA synthesis, degradation, transport and reception |                                             |                       |                           |      |             |      |             |      |
| Th                                                 | Tyrosine hydroxylase                        | DA synthesis          | 0.74                      | 0.10 | 0.81        | 0.23 | 0.56        | 0.01 |
| Ddc                                                | Dopa decarboxylase                          | DA synthesis          | 1.37                      | 0.07 | 1.28        | 0.10 | 0.77        | 0.24 |
| Maoa                                               | Monoamine oxidase B                         | DA degradation        | 0.96                      | 0.88 | 1.29        | 0.00 | 0.88        | 0.70 |
| Maob                                               | Monoamine oxidase B                         | DA degradation        | 0.89                      | 0.50 | 0.62        | 0.01 | 0.91        | 0.67 |
| Comt                                               | Catechol-O-methyltransferase                | DA degradation        | 1.21                      | 0.02 | 1.15        | 0.17 | 1.20        | 0.20 |
| Slc6a3                                             | Dopamine transporter                        | DA reuptake           | 0.80                      | 0.09 | 0.89        | 0.26 | 0.61        | 0.01 |
| Slc18a2                                            | Vesicular monoamine transporter 2           | DA vesicles uptake    | 0.90                      | 0.28 | 0.97        | 0.70 | 0.63        | 0.01 |
| Drd2                                               | Dopamine receptor 2                         | DA reception          | 0.59                      | 0.01 | 0.53        | 0.04 | 0.50        | 0.00 |
| Axonal transport and microtubules                  |                                             |                       |                           |      |             |      |             |      |
| Kif1a                                              | Kinesin                                     | Axonal transport      | 1.17                      | 0.08 | 1.14        | 0.15 | 1.09        | 0.22 |
| Kif5a                                              | Kinesin                                     | Axonal transport      | 0.85                      | 0.95 | 0.76        | 0.60 | 0.95        | 0.61 |
| Dynll1                                             | Dynein light chain                          | Axonal transport      | 0.55                      | 0.02 | 0.62        | 0.02 | 1.01        | 0.96 |
| Dctn1                                              | Dynactin 1                                  | Axonal transport      | 1.22                      | 0.38 | 1.24        | 0.25 | 1.08        | 0.64 |
| Mapt                                               | Microtubule-associated tau                  | Axonal transport      | 1.20                      | 0.01 | 0.96        | 0.72 | 1.03        | 0.29 |
| Map2                                               | Microtubule-associated protein 2            | Axonal transport      | 1.55                      | 0.00 | 1.30        | 0.02 | 1.33        | 0.03 |
| Tubb3                                              | β-tubulin                                   | Axonal transport      | 0.99                      | 0.96 | 0.90        | 0.22 | 0.84        | 0.58 |
| Tuba1a                                             | α-tubulin                                   | Axonal transport      | 1.07                      | 0.69 | 0.87        | 0.25 | 0.97        | 0.61 |
| Vesicle cycle for neurotransmission                |                                             |                       |                           |      |             |      |             |      |
| Snca                                               | α-Synuclein                                 | Neurotransmission     | 1.11                      | 0.42 | 1.05        | 0.74 | 0.77        | 0.03 |
| Syn1                                               | Synapsin 1                                  | Vesicular cycle       | 1.59                      | 0.01 | 1.34        | 0.08 | 1.28        | 0.15 |
| Syt1                                               | Synaptotagmin 1                             | Vesicular cycle       | 1.02                      | 0.85 | 1.08        | 0.38 | 0.92        | 0.51 |
| Syt11                                              | Synaptotagmin 11                            | Endocytosis           | 1.29                      | 0.04 | 1.06        | 0.63 | 1.06        | 0.66 |
| Rab5a                                              | RAB5A                                       | Endocytosis           | 1.46                      | 0.08 | 1.14        | 0.66 | 1.28        | 0.22 |
| Rab7                                               | RAB7                                        | Endocytosis           | 1.08                      | 0.54 | 1.05        | 0.71 | 1.09        | 0.47 |
| Nsf                                                | N-ethylmaleimide sensitive fusion protein   | Vesicular cycle       | 1.51                      | 0.00 | 1.26        | 0.05 | 1.32        | 0.02 |
| Dnm1l                                              | Dynamin 1-like protein                      | Mitochondrial fission | 1.34                      | 0.02 | 1.25        | 0.05 | 1.21        | 0.06 |
| Vps35                                              | Vacuolar protein sorting ortholog 35        | Vesicular cycle       | 1.41                      | 0.01 | 1.21        | 0.07 | 1.49        | 0.00 |
| Protein degradation                                |                                             |                       |                           |      |             |      |             |      |
| Ube2n                                              | Ubiquitin Conjugating Enzyme E2 N           | E2 enzyme             | 1.07                      | 0.41 | 0.85        | 0.04 | 1.05        | 0.69 |
| Uba3                                               | Ubiquitin like modifier activating enzyme 3 | E1 enzyme             | 1.34                      | 0.11 | 1.11        | 0.56 | 1.33        | 0.06 |

|                                                  |                                                         |                                                         |      |      |      |      |      |      |
|--------------------------------------------------|---------------------------------------------------------|---------------------------------------------------------|------|------|------|------|------|------|
| <i>Psmb4</i>                                     | Proteasome 20S Subunit Beta 4                           | Proteasome subunits                                     | 1.29 | 0.01 | 1.10 | 0.18 | 0.90 | 0.28 |
| <i>Psmc3</i>                                     | Proteasome 26S Subunit. ATPase 3                        | Proteasome subunits                                     | 1.07 | 0.86 | 0.97 | 0.73 | 1.02 | 0.94 |
| <i>Psmc4</i>                                     | Proteasome 26S subunit ubiquitin receptor. non-ATPase 4 | Proteasome subunits                                     | 1.20 | 0.05 | 1.48 | 0.00 | 1.31 | 0.23 |
| <i>Usp47</i>                                     | Ubiquitin specific peptidase 47                         | Protein deubiquitination                                | 1.70 | 0.00 | 1.72 | 0.00 | 1.41 | 0.04 |
| <i>Ubb</i>                                       | Ubiquitin B                                             | Targeting cellular proteins for degradation             | 1.19 | 0.14 | 1.11 | 0.27 | 1.12 | 0.27 |
| <i>Ctsb</i>                                      | Cystatin-B                                              | Protein degradation                                     | 1.07 | 0.51 | 0.93 | 0.82 | 1.08 | 0.33 |
| <b>Neuroprotection</b>                           |                                                         |                                                         |      |      |      |      |      |      |
| <i>Sod1</i>                                      | Superoxide dismutase 1                                  | Antioxidant system                                      | 1.30 | 0.03 | 1.12 | 0.31 | 1.01 | 0.60 |
| <i>Gpx1</i>                                      | Glutathione peroxidase 1                                | Antioxidant system                                      | 1.30 | 0.01 | 1.17 | 0.17 | 1.04 | 0.65 |
| <i>Gsr</i>                                       | Glutathione reductase                                   | Antioxidant system                                      | 1.36 | 0.76 | 1.62 | 0.82 | 0.86 | 0.71 |
| <i>Txnrd1</i>                                    | Thioredoxin reductase 1                                 | Antioxidant system                                      | 2.59 | 0.01 | 2.32 | 0.01 | 2.41 | 0.01 |
| <i>Prdx1</i>                                     | Peroxiredoxin 1                                         | Antioxidant system                                      | 0.73 | 0.03 | 0.94 | 0.53 | 0.75 | 0.34 |
| <i>Nfe2l2</i>                                    | Nuclear factor erythroid 2-related factor 2             | Transcriptome factor (regulation of antioxidant system) | 2.31 | 0.02 | 1.82 | 0.12 | 1.84 | 0.12 |
| <i>Keap1</i>                                     | kelch-like ECH-associated protein 1                     | Regulation of Nfe2l2                                    | 1.49 | 0.01 | 1.48 | 0.00 | 1.04 | 0.78 |
| <i>Sigmar1</i>                                   | Sigma-1 receptor                                        | Chaperone protein, Calcium signaling                    | 1.02 | 0.83 | 1.10 | 0.57 | 0.99 | 0.97 |
| <i>Ntrk2</i>                                     | Neurotrophic receptor tyrosine kinase 2                 | Neurotrophic factor receptor                            | 1.30 | 0.00 | 1.22 | 0.00 | 1.06 | 0.26 |
| <i>Nr4a2</i>                                     | Nuclear receptor subfamily 4 group A member 2           | Transcriptome factor                                    | 1.10 | 0.96 | 0.80 | 0.32 | 0.49 | 0.05 |
| <i>Calb1</i>                                     | Calbindin 1                                             | Ca <sup>2+</sup> -binding protein                       | 1.48 | 0.18 | 1.20 | 0.37 | 2.25 | 0.03 |
| <b>Inflammation and glial activation</b>         |                                                         |                                                         |      |      |      |      |      |      |
| <i>Gfap</i>                                      | Glial fibrillary acidic protein                         | Glial activation                                        | 0.64 | 0.20 | 0.79 | 0.28 | 0.56 | 0.74 |
| <i>Akt1</i>                                      | Protein kinase B alpha                                  | Cell proliferation. survival                            | 1.11 | 0.51 | 1.07 | 0.66 | 0.91 | 0.85 |
| <i>Cnr1</i>                                      | Cannabinoid Receptor 1                                  | Pre-mRNA processing                                     | 1.60 | 0.01 | 1.49 | 0.03 | 1.66 | 0.02 |
| <i>Clk1</i>                                      | CDC Like Kinase 1                                       | Endocannabinoid system                                  | 1.63 | 0.00 | 1.06 | 0.70 | 1.55 | 0.00 |
| <b>Apoptosis, necrosis, autophagy, ER stress</b> |                                                         |                                                         |      |      |      |      |      |      |
| <i>Parp1</i>                                     | Poly [ADP-ribose] polymerase 1                          | DNA repair, apoptosis                                   | 1.18 | 0.28 | 0.96 | 0.99 | 0.98 | 0.62 |
| <i>Cib1</i>                                      | Ca <sup>2+</sup> and integrin binding 1                 | Apoptosis                                               | 1.60 | 0.06 | 1.01 | 0.79 | 1.01 | 0.79 |
| <i>Aifm1</i>                                     | Apoptosis inducing factor mitochondria associated 1     | Apoptosis                                               | 1.34 | 0.28 | 1.10 | 0.65 | 1.29 | 0.44 |

|              |                                         |                                  |      |      |      |      |      |      |
|--------------|-----------------------------------------|----------------------------------|------|------|------|------|------|------|
| <i>Bax</i>   | Bax protein                             | Apoptosis                        | 1.10 | 0.47 | 1.24 | 0.08 | 0.97 | 0.83 |
| <i>Mapk8</i> | Mitogen-activated protein kinase 8      | Apoptosis                        | 1.32 | 0.24 | 0.91 | 0.41 | 1.30 | 0.23 |
| <i>Lamp2</i> | Lysosomal associated membrane protein 2 | Autophagy                        | 1.16 | 0.11 | 1.01 | 0.80 | 1.06 | 0.49 |
| <i>Atg5</i>  | Autophagy related 5                     | Autophagy                        | 1.64 | 0.09 | 1.26 | 0.53 | 1.36 | 0.40 |
| <i>Trp53</i> | Transformation related protein 53       | Regulation apoptosis, DNA repair | 0.86 | 0.96 | 1.12 | 0.45 | 0.84 | 0.40 |

DA — dopamine, ER – endoplasmic reticulum.

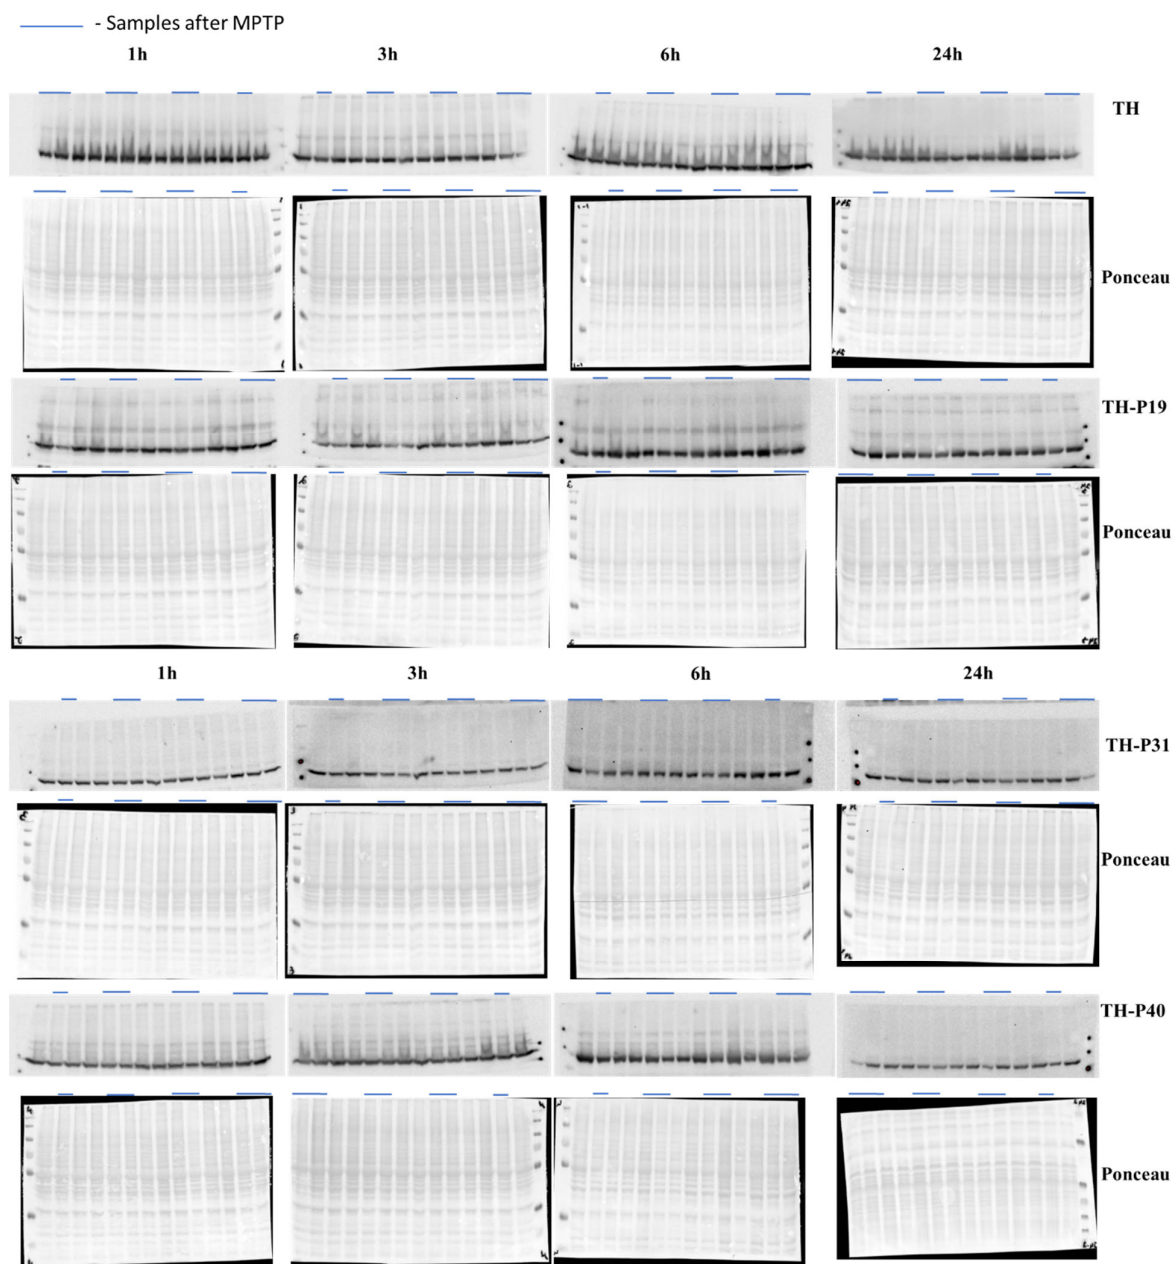

**Figure S1.** Representative western blot of tyrosine hydroxylase (TH), its phosphorylated forms at Ser19, Ser31, and Ser40 and membranes stained by Ponceau 1, 3, 6, and 24 h after twice administration of 1-methyl-4-phenyl-1,2,3,6-tetrahydropyridine (MPTP) at a dose of 6 mg/kg and in the control.
